# Supplementary material
Source: publisher figshare collection journal article supplement (https://frontiersin.figshare.com/ndownloader/files/10646602)
Supplement: Supplementary file [file 10646602]

Supplementary Information:

Supplementary Figures 1-7

Supplementary Table 1

Supplementary Figure 1:

A

| Accession | Samples          | Reference                | Total Reads |
|-----------|------------------|--------------------------|-------------|
| SRR444655 | Hs68 - control#1 | Jeck <i>et al</i> , 2012 | 314106316   |
| SRR444974 | Hs68 - RNaseR#1  | Jeck <i>et al</i> , 2012 | 316611710   |
| SRR444975 | Hs68 - control#2 | Jeck <i>et al</i> , 2012 | 412725466   |
| SRR445016 | Hs68 - RNaseR#2  | Jeck <i>et al</i> , 2012 | 399844972   |

B

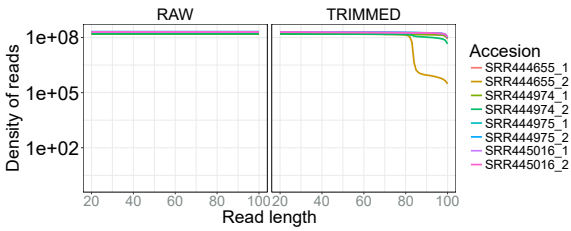

**Supplementary Figure 1: The RNAseq dataset.** **A)** Table with accession numbers, sample content and corresponding read counts. **B)** Density of read-lengths before (Raw) and after processing by trim\_galore.

## Supplementary Figure 2:

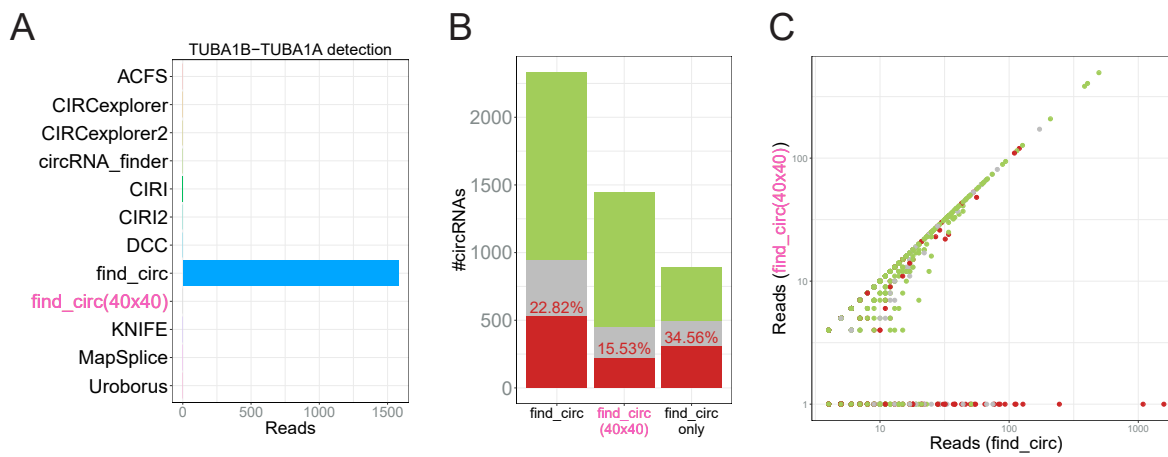

**Supplementary Figure 2: Find\_circ(40x40).** **A)** Mis-detection of TUBA1A-TUBA1B circRNA using all algorithms including the stringent find\_circ(40x40) with conservative threshold for mapping quality. **B)** Stacked barplot color-coded as Fig 1A comparing the fractions of true and false-positive, i.e. RNaseR resistant and RNaseR sensitive species, respectively, predicted by find\_circ or find\_circ(40x40). In addition, the subset of circRNA eliminated with increased threshold for mapping quality (find\_circ only) is shown. **C)** Scatterplot on circRNAs predicted by default find\_circ and find\_circ(40x40) color-coded as in Fig 1A.

## Supplementary Fig 3: False Negatives

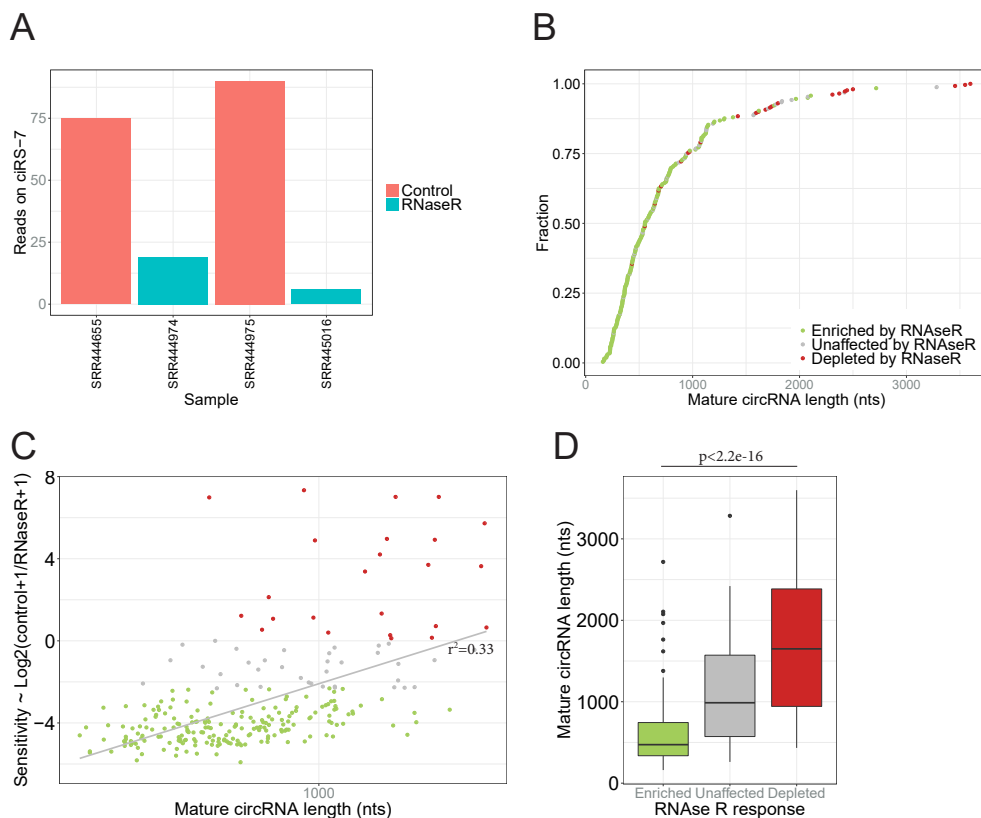

**Supplementary Figure 3: False Negatives.** **A)** Barplot with backsplice-spanning reads on ciRS-7 in each sample predicted by CIRI2. **B)** Cumulative fraction plot on mature circRNA length (i.e. the fully spliced circRNA according to hostgene annotations) on the subset of circRNAs predicted by all algorithms (n=259) color-coded as shown. **C)** Scatterplot on RNase R sensitivity as a function of mature circRNA length color-coded as in B. **D)** Boxplot on mature circRNA length subgroup by RNaseR sensitivity as shown. P-value is determined by Wilcoxon rank-sum test.

Supplementary Fig 4:

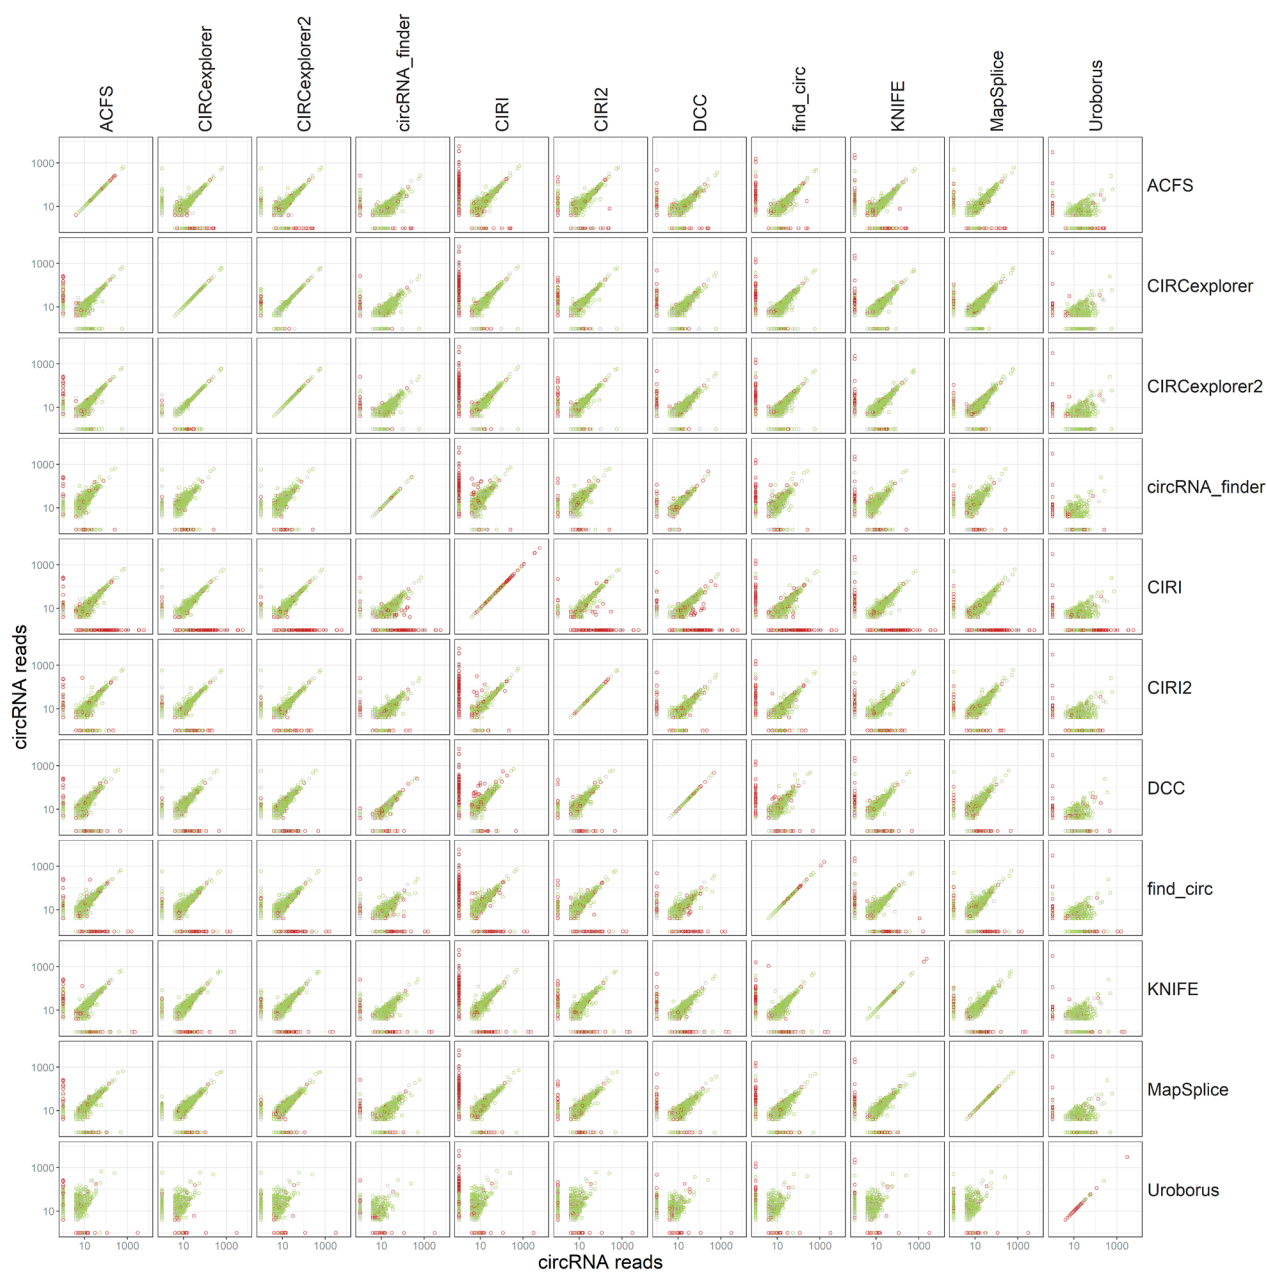

**Supplementary Figure 4: Comparing algorithms.** Scatterplots on circRNAs predicted by any two algorithms color-coded as in Fig. 1A. These individual scatterplots are interactively available at [www.ncrnalab.dk/battle\\_of\\_algorithms](http://www.ncrnalab.dk/battle_of_algorithms).

Supplementary Fig 5:

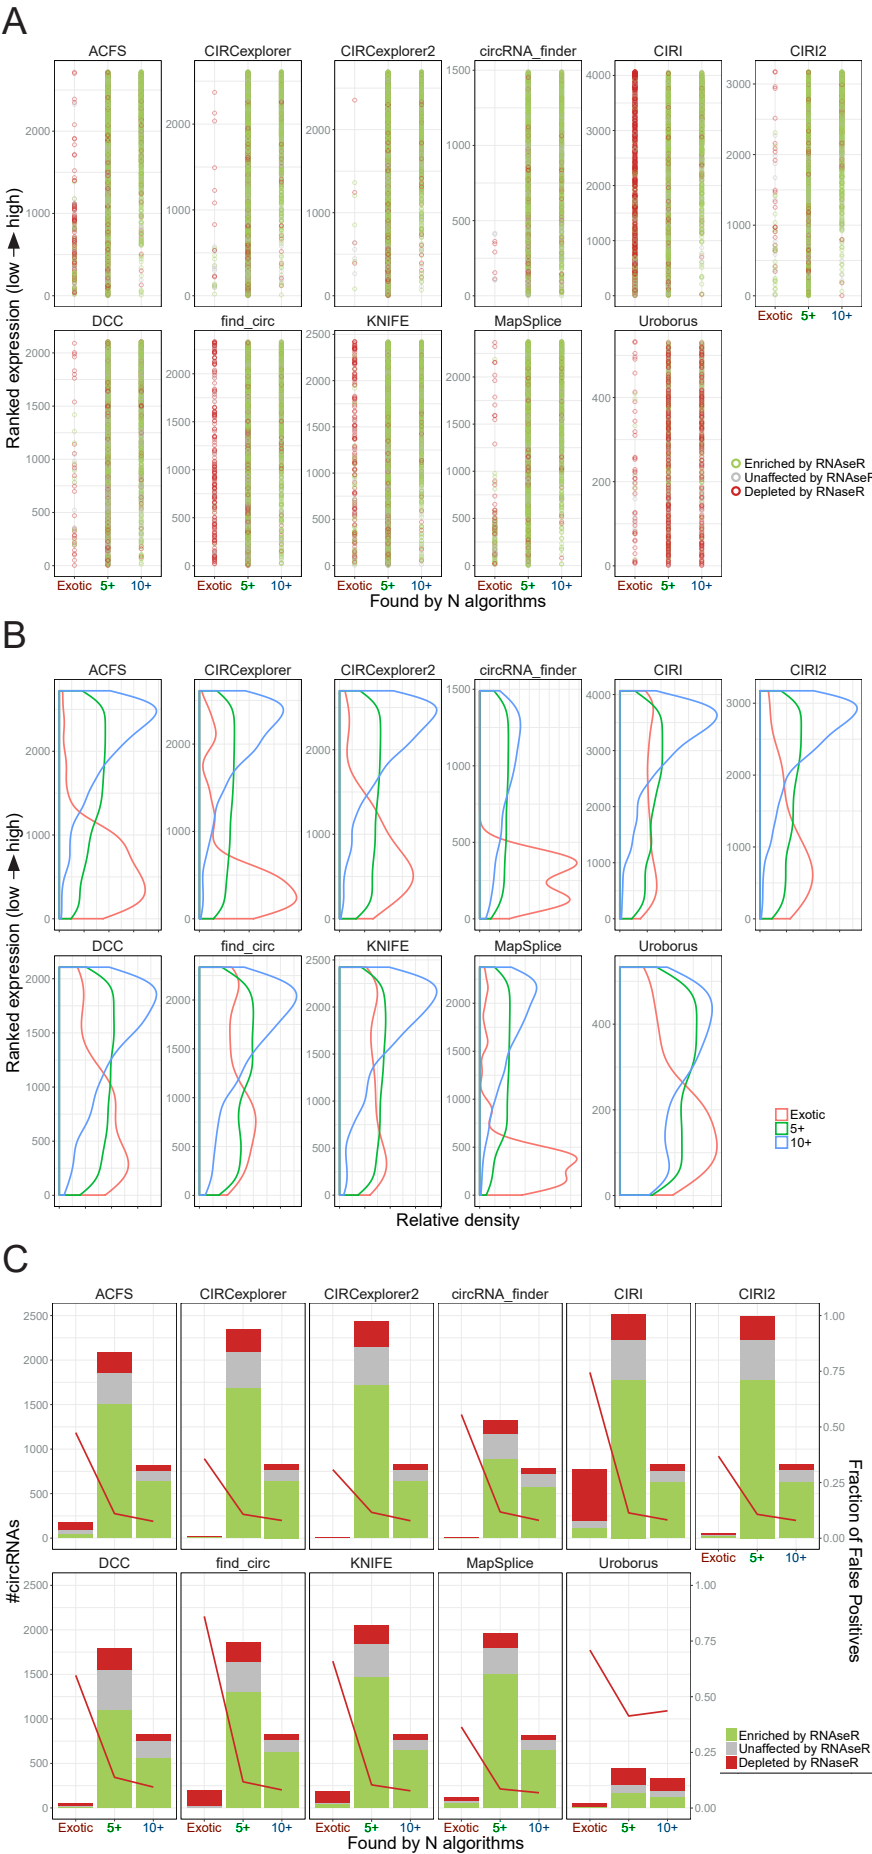

**Supplementary Figure 5: circRNAs found by multiple algorithms. A)** Ranked expression of circRNAs found exotically (only by one algorithm as denoted in strip), shared by at least 5 algorithms (5+) or shared by at least 10 algorithms (10+) color-coded as depicted. **B)** The density of circRNAs ranked by expression and subgrouped as in A. **C)** Number of predicted circRNAs subgrouped as in A and demarcated by RNaseR sensitivity (as in Fig 1A). Also, the fraction of false positives, i.e. RNaseR sensitive species, is depicted for each algorithm by red line (right-bound y-axis).

## Supplementary Fig 6:

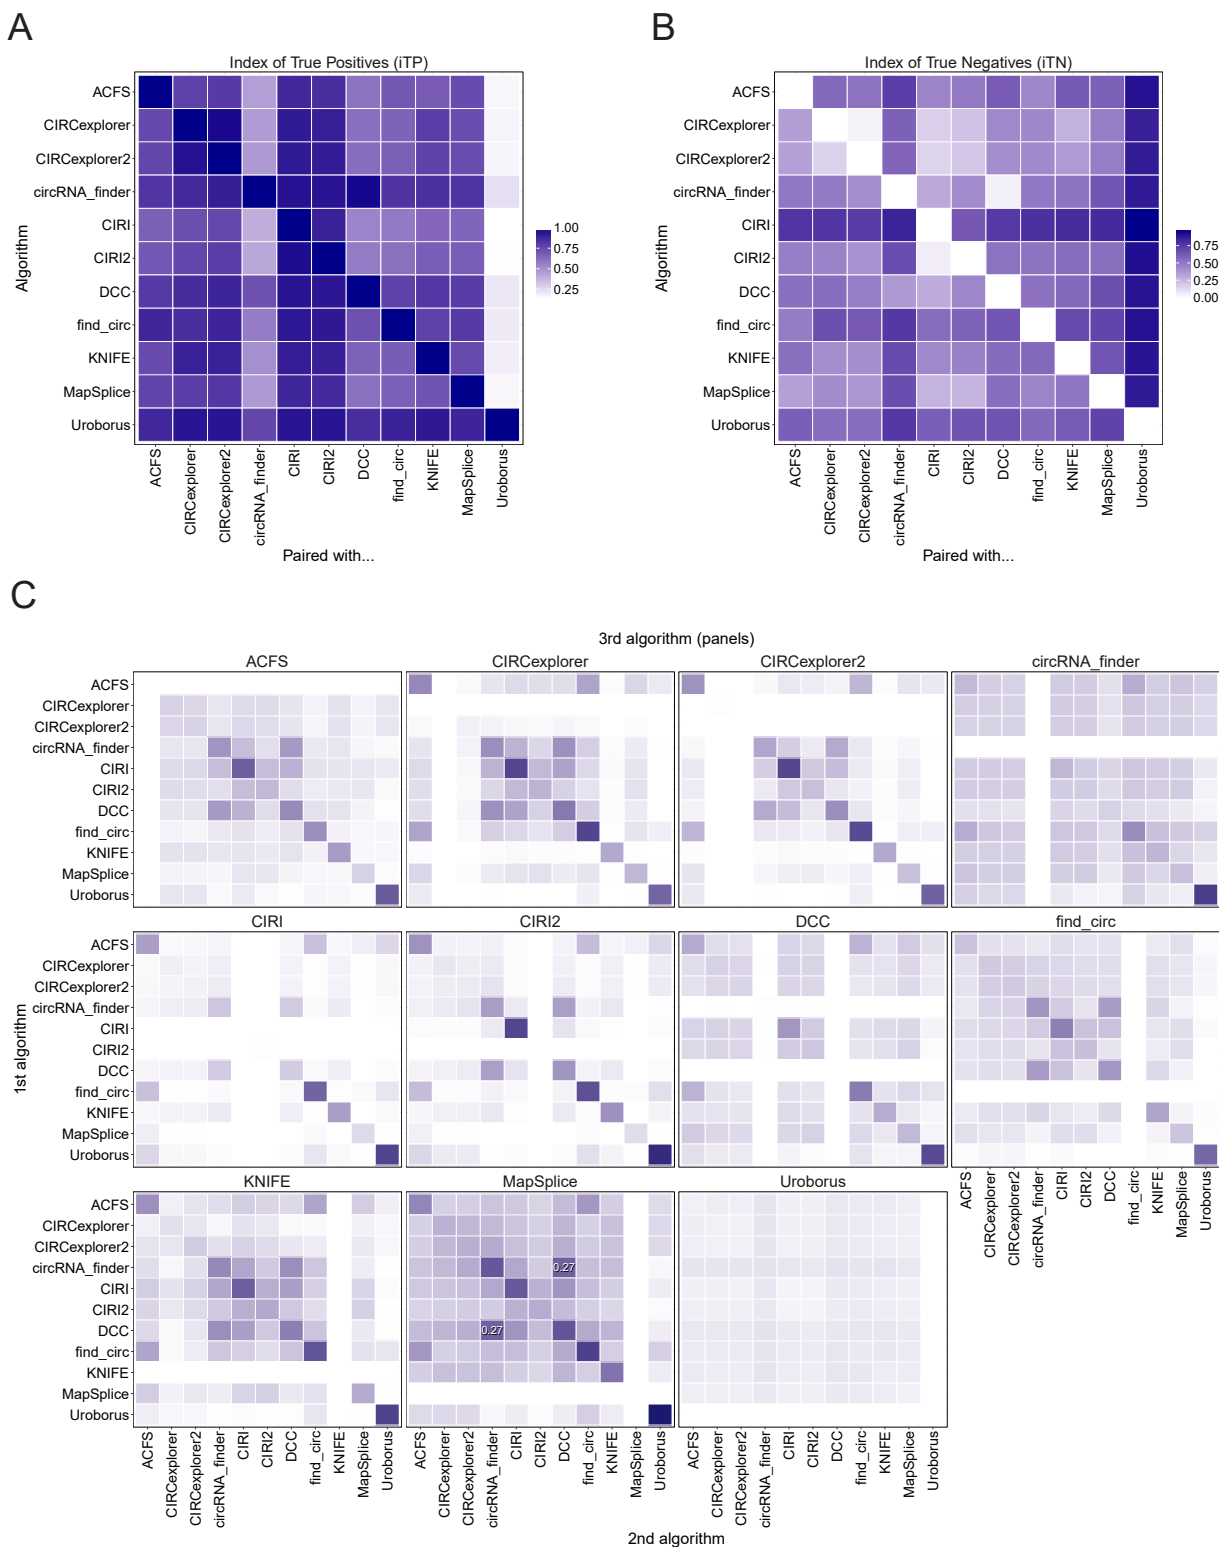

**Supplementary Figure 6: Index of true positives and negatives.** A-B) Heatmaps on iTP (true positive index, A) and iTN (true negative index, B). The true positive index (iTP) is defined as the fraction of true positive circRNAs, i.e. RNaseR resistant species, predicted by algorithm on y-axis and shared with algorithm on x-axis. The true negative index (iTN) is defined as  $1 - fN$  where  $fN$  is the fraction of RNaseR sensitive species predicted in algorithm denoted on y-axis and conjointly identified in other algorithm (x-axis). C) Three-wise Complementary scores. Here, the shared output from two algorithms (x and y-axis) was merged with a third algorithm, and the Complementary score was calculated as for the pair-wise comparison.

## Supplementary Fig 7:

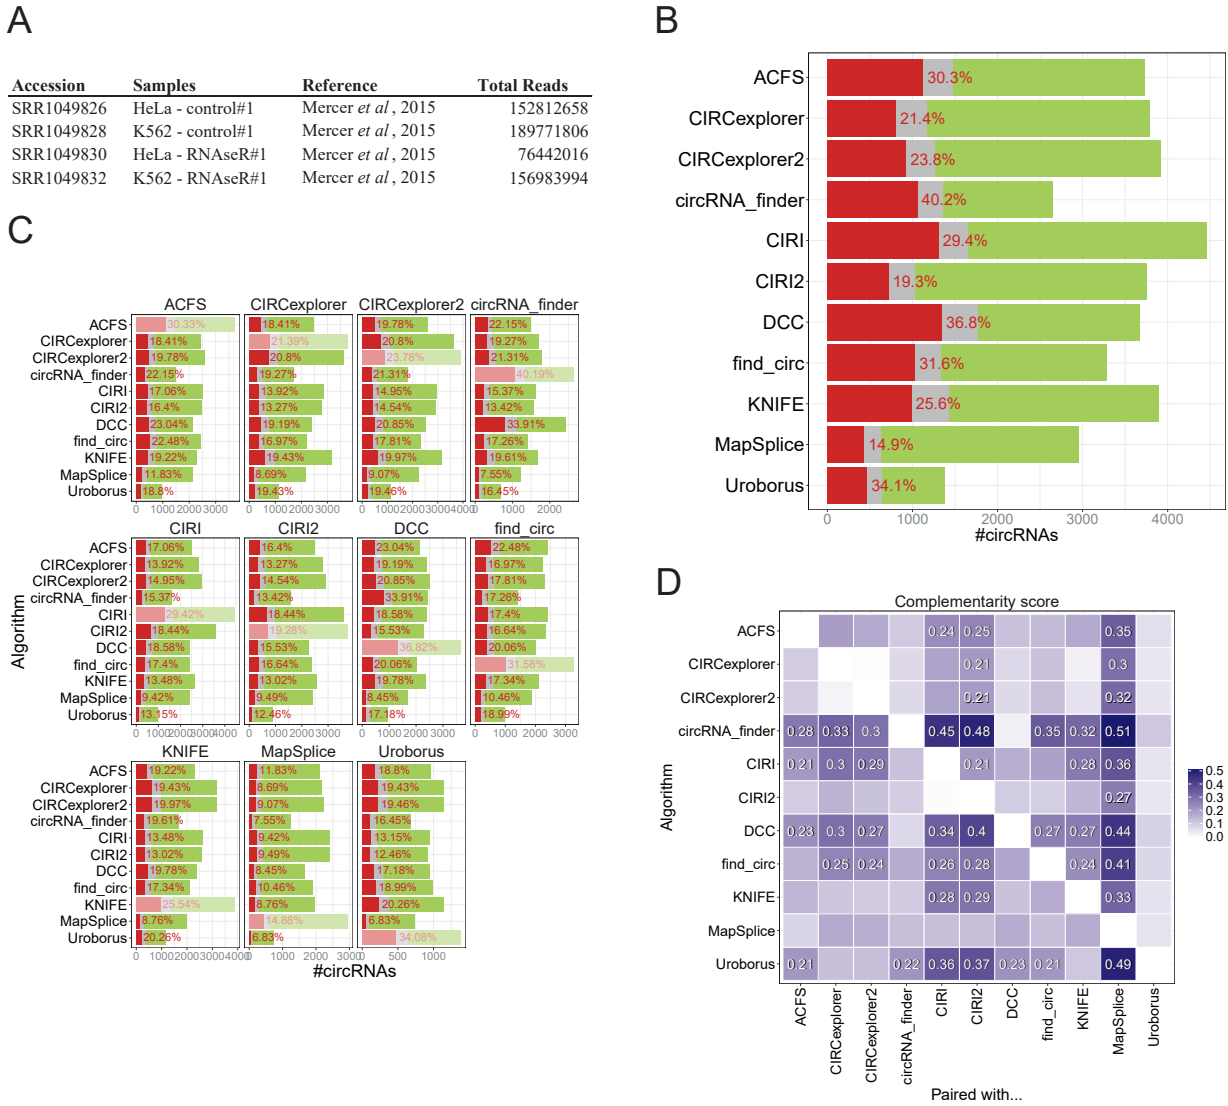

**Supplementary Figure 7: CircRNA prediction on samples from GSE53327. A)** Table with accession numbers, sample content and corresponding read counts. **B)** Stacked barplot (as in Fig 1A) of all predicted circRNAs stratified by RNase R resistant ( $\geq 2$  fold enrichment, green), Unaffected (0.7-2 fold enrichment, grey) and RNase R sensitive (below 0.7-fold enrichment in RNaseR treated samples, red), as denoted. Percentage reflects the fraction of RNaseR sensitive circRNAs defined as false positives. **C)** Comprehensive stacked barplot analysis of RNaseR sensitivity in the shared predictions by any two algorithms (as in Fig 4A). The ‘dimmed’ bars denote the unpaired algorithm. **D)** Heatmap on complementarity score (as in Fig 4C). The complementarity score is calculated as  $(iTFxiTN)^2$ , where  $iTF$  is the fraction of true positive circRNAs (RNaseR resistant circRNAs, defined as in B) found in algorithm denoted on the y-axis and shared with algorithm on x-axis, and  $iTN$  is  $1-fN$ , where  $fN$  is the fraction of RNaseR sensitive species conjointly identified in other algorithm. Complementarity scores  $\geq 0.2$  are denoted specifically.



Supplementary Table 1: Exotic and abundant false positives

| Tool      | circRNA coordinate |           |           | Reads (SRR44xxxx) |       |         |       |
|-----------|--------------------|-----------|-----------|-------------------|-------|---------|-------|
|           | Chromosome         | Start     | End       | 4655              | 4974  | 4975    | 5016  |
| CIRI2     | chrY               | 10035908  | 10037910  | 0                 | 0     | 1016175 | 0     |
| CIRI      | chrY               | 10037756  | 10037910  | 548571            | 7479  | 0       | 5518  |
| CIRI      | chr17              | 33134804  | 33478372  | 277480            | 0     | 0       | 0     |
| CIRI      | chr19              | 36066504  | 36066612  | 18906             | 30292 | 32188   | 15442 |
| CIRI      | chr2               | 133012802 | 133012899 | 0                 | 3255  | 5920    | 2390  |
| CIRI      | chr5               | 71146746  | 71146931  | 575               | 0     | 2990    | 0     |
| CIRI      | chr2               | 230045488 | 230045596 | 0                 | 0     | 3457    | 0     |
| Uroborus  | chrUn_g1000220     | 155996    | 156152    | 3088              | 0     | 0       | 0     |
| KNIFE     | chr1               | 91852900  | 91852950  | 305               | 0     | 2008    | 828   |
| KNIFE     | chr11              | 85195100  | 85195150  | 238               | 0     | 1464    | 0     |
| find_circ | chr12              | 49525080  | 49580616  | 476               | 235   | 1102    | 90    |
| CIRI      | chr16              | 33963109  | 33963327  | 1092              | 0     | 0       | 0     |
| find_circ | chr12              | 49523282  | 49580241  | 274               | 107   | 816     | 55    |
| CIRI      | chr2               | 230045488 | 230045625 | 1054              | 0     | 0       | 0     |

Control

RNaseR

**Supplementary Table 1: Exotic and abundant false positives.** The genomic coordinates (hg19), responsible algorithm, and the associated read-counts for the 14 most highly abundant circRNA across all pipelines.
